# Supplementary material
Source: publisher figshare collection journal article supplement (https://frontiersin.figshare.com/ndownloader/files/17706617)
Supplement: Supplementary file [file 17706617]

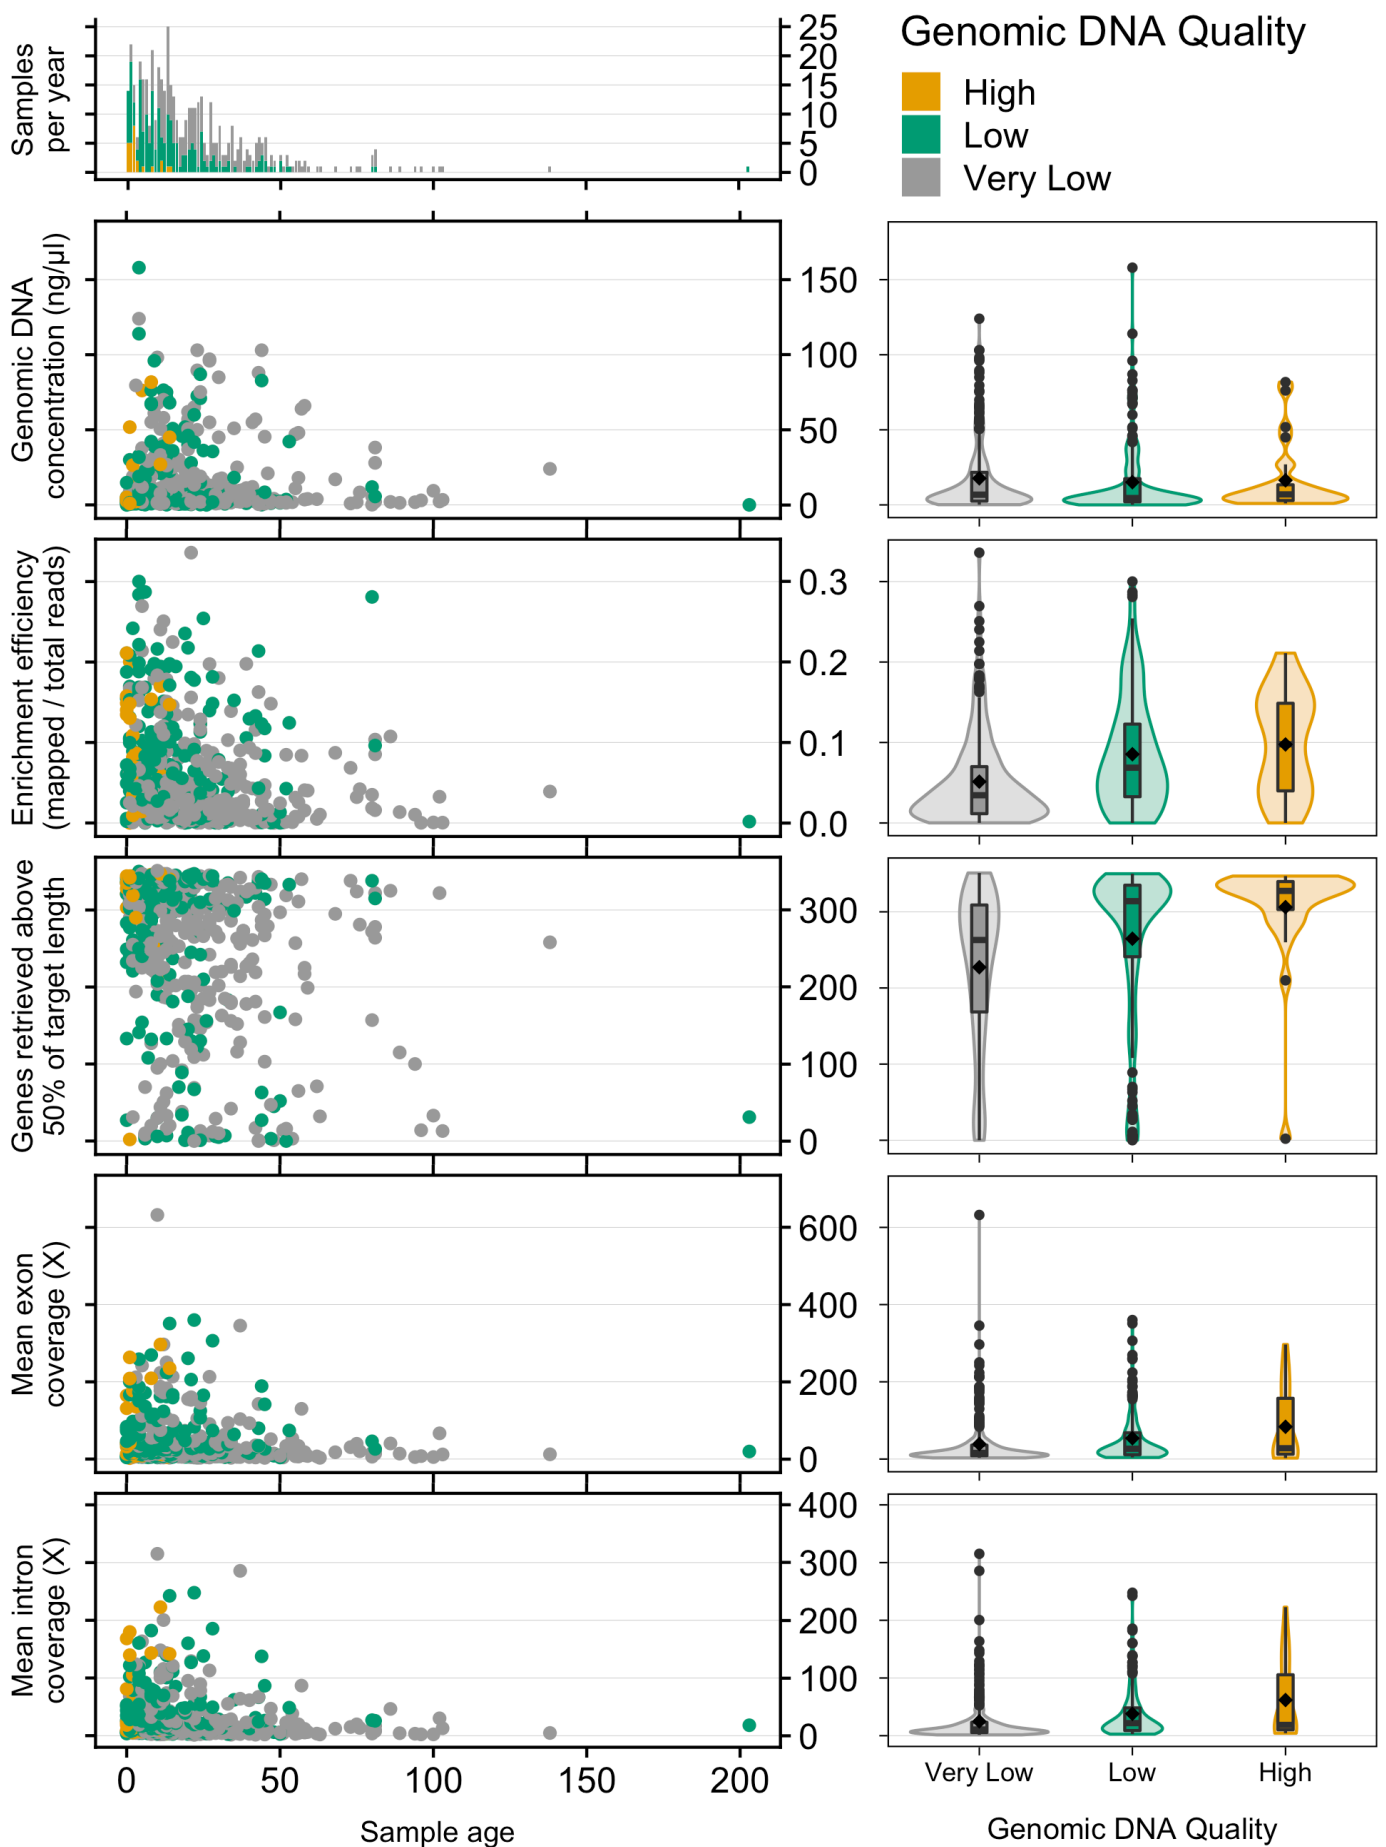

**Figure S1** | Frequency of samples per age and genomic DNA concentration (ng/μl), target enrichment efficiency (mapped/total reads), genes retrieved above 50% of target length, and mean exon and intron coverage (X) by sample age and genomic DNA quality. Quality is defined as: very low (severely fragmented DNA <500 bp), low (DNA smear on agarose gel), or high (high molecular weight DNA >5 Kbp). Inside each violin plot is a boxplot summarising the interquartile range and median. The diamond symbol denotes the mean while circles represent outliers. The horizontal width of the plot shows the density of the data along the y-axis.
